# Supplementary material
Source: publisher figshare collection journal article supplement (https://frontiersin.figshare.com/ndownloader/files/30977989)
Supplement: Supplementary file [file 30977989]

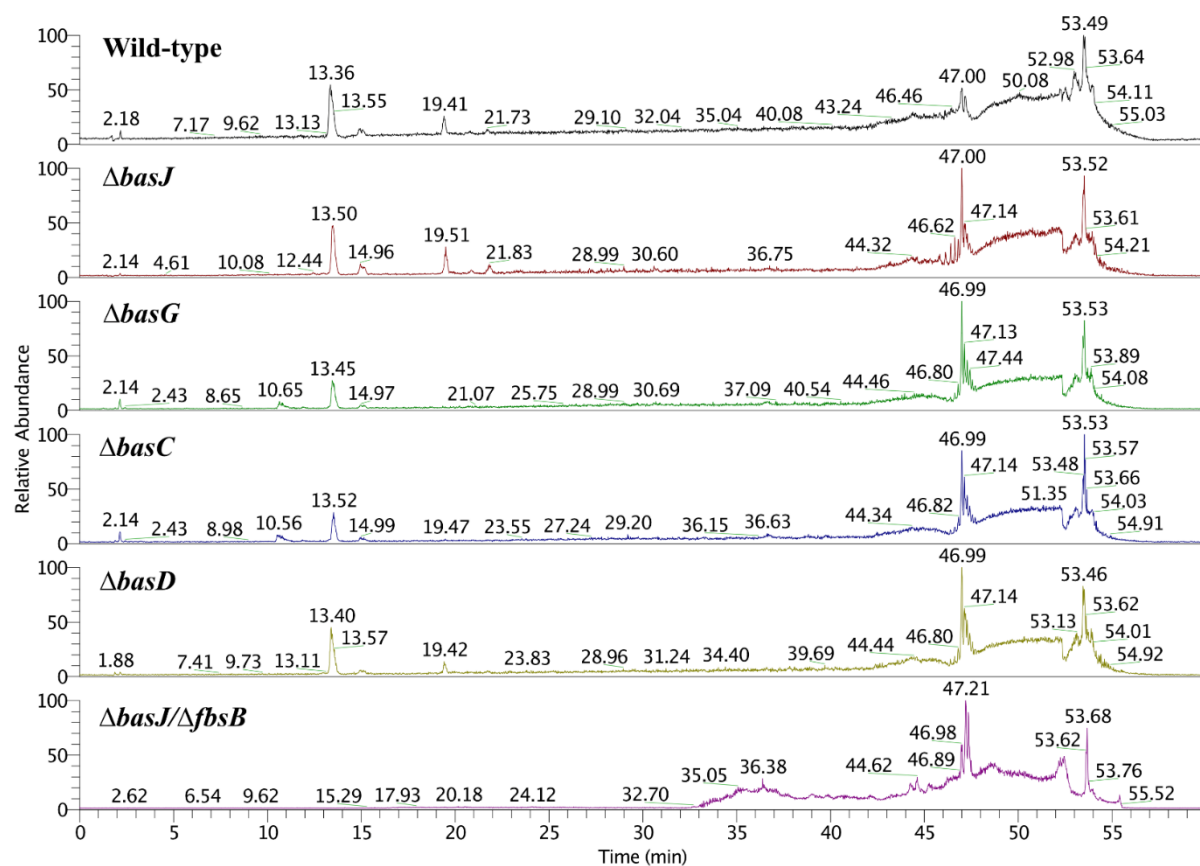

**Supplementary Figure 10.** Comparison between the total ion current (TIC) chromatographic profiles of the ABHL5 fractions of *A. baumannii* wild-type and mutant strains lacking genes involved in the biosynthesis of acinetobactin.
